# Supplementary material for: Non-Adherence in Adult Male Patients with Community-Acquired Pneumonia: Relative Forgiveness of Amoxicillin versus Respiratory Fluoroquinolones
Source: MDPI journal article supplement (doi:10.3390/antibiotics12050838), 2023-05-01
Supplement: s1 [file s1]

**Supplementary Table S1.** Simulated pharmacokinetic parameters for Amoxicillin (AMOX) in virtual male outpatients, categorized on CL<sub>CR</sub> subgroups. CL<sub>CR</sub>: creatinine clearance (calculated using the Cockcroft-Gault formulae); Vd/F, CL/F and T<sub>1/2</sub>: apparent volume distribution, clearance and elimination half-life parameters respectively. Values are expressed as mean ± standard deviations.

| CL <sub>CR</sub> and PK Parameters | SCr (mg/dL) |            |            |
|------------------------------------|-------------|------------|------------|
|                                    | 0.7         | 0.9        | 1.3        |
| CL <sub>CR</sub> (mL/min)          | 131 ± 10    | 100 ± 8    | 70 ± 6     |
| CL/F (L/h)                         | 20.1 ± 4.0  | 15.7 ± 3.3 | 10.8 ± 2.1 |
| Vd/F (L)                           | 23.3 ± 3.9  | 23.3 ± 3.9 | 23.3 ± 3.9 |
| T <sub>1/2</sub> (h)               | 0.8 ± 0.2   | 1 ± 0.2    | 1.5 ± 0.3  |

**Supplementary Table S2:** Simulated pharmacokinetic parameters for Levofloxacin (LFX) and Moxifloxacin (MOX) in virtual male outpatients, categorized on CL<sub>CR</sub> subgroups. CL<sub>CR</sub>: creatinine clearance (calculated using the Cockcroft-Gault formulae); CL/F: apparent clearance used to AUC calculation. Values are expressed as mean ± standard deviations.

| CL <sub>CR</sub> and PK Parameters | SCr (mg/dL) |            |            |
|------------------------------------|-------------|------------|------------|
|                                    | 0.7         | 0.9        | 1.3        |
| CL <sub>CR</sub> (mL/min)          | 131 ± 10    | 100 ± 8    | 70 ± 6     |
| CL/F LFX (L/h)                     | 14.9 ± 0.6  | 11 ± 0.9   | 9.7 ± 0.38 |
| CL/F MOX (L/h)                     | 10.1 ± 1.9  | 10.1 ± 1.9 | 10.1 ± 1.9 |
